# Supplementary material for: Transnasal delivery of human A-beta peptides elicits impaired learning and memory performance in wild type mice
Source: PubMed Central journal article supplement (PMC4932715; doi:10.1186/s12868-016-0280-9), 2016-07-04
Supplement: 12868_2016_280_MOESM2_ESM.pdf [file 12868_2016_280_MOESM2_ESM.pdf]

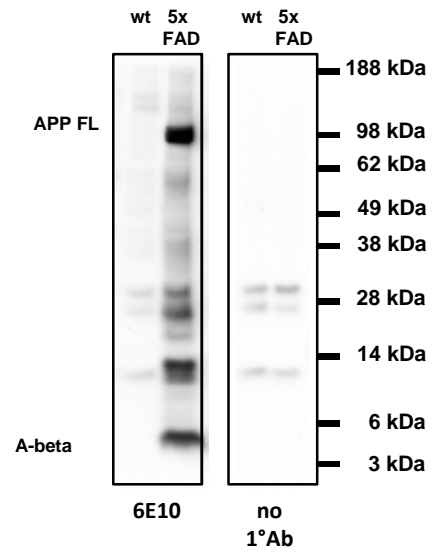

**Specificity control for antibody 6E10.**

20 µg of proteins from brain tissue of wt or AD model mouse (5xFAD) were subjected to 4-12% SDS-polyacrylamide gel and transferred to nitrocellulose membrane. Signals were obtained by combining antibody 6E10 and secondary HRP-coupled antibody (left) or by secondary antibody only (right).
