# Supplementary material for: Transnasal delivery of human A-beta peptides elicits impaired learning and memory performance in wild type mice
Source: PubMed Central journal article supplement (PMC4932715; doi:10.1186/s12868-016-0280-9), 2016-07-04
Supplement: 12868_2016_280_MOESM3_ESM.pdf [file 12868_2016_280_MOESM3_ESM.pdf]

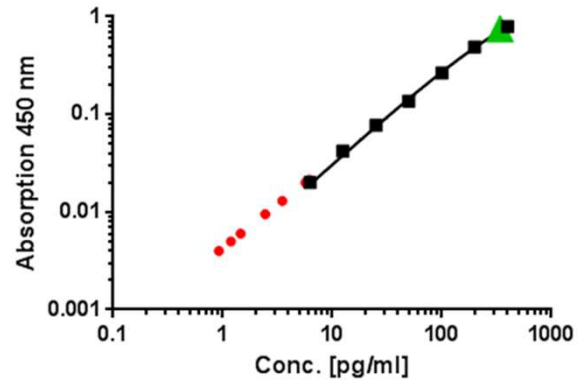

**Analysis of A-beta 42 peptides from transnasally treated mice.**

Animals were treated for three consecutive days with A-beta 42 peptides administered to the nose or with solvent control. Brains were dissected after behavioral task performance of the mice, stored at -80 C and extracted with 70% formic acid. 100 µl extraction supernatant from solvent (n=3) or peptide-treated (n=4) mice were subjected to human A-beta 42 ELISA (IBL) as recommended by the vendor. All measured values were at or below the lowest standard (red dots). As a positive control we used brain extract from an age-matched 5xFAD mouse (green triangle).
